# Supplementary material for: Mechanisms of life cycle simplification in African trypanosomes
Source: Springer Nature journal article supplement (doi:10.1038/s41467-024-54555-w), 2024-12-02
Supplement: MOESM12 [file 41467_2024_54555_MOESM12_ESM.pdf]

Reporting Summary

Nature Portfolio wishes to improve the reproducibility of the work that we publish. This form provides structure for consistency and transparency in reporting. For further information on Nature Portfolio policies, see our [Editorial Policies](#) and the [Editorial Policy Checklist](#).

Statistics

For all statistical analyses, confirm that the following items are present in the figure legend, table legend, main text, or Methods section.

|                                     |                                                                                                                                                                                                                                                                                                |
|-------------------------------------|------------------------------------------------------------------------------------------------------------------------------------------------------------------------------------------------------------------------------------------------------------------------------------------------|
| n/a                                 | Confirmed                                                                                                                                                                                                                                                                                      |
| <input type="checkbox"/>            | <input checked="" type="checkbox"/> The exact sample size ( <i>n</i> ) for each experimental group/condition, given as a discrete number and unit of measurement                                                                                                                               |
| <input type="checkbox"/>            | <input checked="" type="checkbox"/> A statement on whether measurements were taken from distinct samples or whether the same sample was measured repeatedly                                                                                                                                    |
| <input type="checkbox"/>            | <input checked="" type="checkbox"/> The statistical test(s) used AND whether they are one- or two-sided<br><i>Only common tests should be described solely by name; describe more complex techniques in the Methods section.</i>                                                               |
| <input checked="" type="checkbox"/> | <input type="checkbox"/> A description of all covariates tested                                                                                                                                                                                                                                |
| <input type="checkbox"/>            | <input checked="" type="checkbox"/> A description of any assumptions or corrections, such as tests of normality and adjustment for multiple comparisons                                                                                                                                        |
| <input type="checkbox"/>            | <input checked="" type="checkbox"/> A full description of the statistical parameters including central tendency (e.g. means) or other basic estimates (e.g. regression coefficient) AND variation (e.g. standard deviation) or associated estimates of uncertainty (e.g. confidence intervals) |
| <input type="checkbox"/>            | <input checked="" type="checkbox"/> For null hypothesis testing, the test statistic (e.g. <i>F</i> , <i>t</i> , <i>r</i> ) with confidence intervals, effect sizes, degrees of freedom and <i>P</i> value noted<br><i>Give P values as exact values whenever suitable.</i>                     |
| <input checked="" type="checkbox"/> | <input type="checkbox"/> For Bayesian analysis, information on the choice of priors and Markov chain Monte Carlo settings                                                                                                                                                                      |
| <input checked="" type="checkbox"/> | <input type="checkbox"/> For hierarchical and complex designs, identification of the appropriate level for tests and full reporting of outcomes                                                                                                                                                |
| <input checked="" type="checkbox"/> | <input type="checkbox"/> Estimates of effect sizes (e.g. Cohen's <i>d</i> , Pearson's <i>r</i> ), indicating how they were calculated                                                                                                                                                          |

Our web collection on [statistics for biologists](#) contains articles on many of the points above.

Software and code

Policy information about [availability of computer code](#)

|                 |                                                                                                                                                                                                                                                                                                                                                                                                                                                                                                                                                                                                                                                                                                                                                                                                                                                                                                                                                                                                                                                                                                                                                                              |
|-----------------|------------------------------------------------------------------------------------------------------------------------------------------------------------------------------------------------------------------------------------------------------------------------------------------------------------------------------------------------------------------------------------------------------------------------------------------------------------------------------------------------------------------------------------------------------------------------------------------------------------------------------------------------------------------------------------------------------------------------------------------------------------------------------------------------------------------------------------------------------------------------------------------------------------------------------------------------------------------------------------------------------------------------------------------------------------------------------------------------------------------------------------------------------------------------------|
| Data collection | All code written for this study has been deposited on GitHub ( <a href="https://github.com/goldrieve/Mechanisms-of-life-cycle-simplification">https://github.com/goldrieve/Mechanisms-of-life-cycle-simplification</a> ). The workflow was implemented with SnakeMake.                                                                                                                                                                                                                                                                                                                                                                                                                                                                                                                                                                                                                                                                                                                                                                                                                                                                                                       |
| Data analysis   | The quality of the raw reads was analysed with FastQC and subjected to quality trimming with Trimmomatic. The trimmed reads were aligned to the <i>T. brucei</i> TREU927/4V5 reference genome with bwa-mem. The reads were prepared for variant calling following the GATK4 best practices pipeline, which included marking duplicate reads. The variants were combined and filtered with stringent cut-offs, in keeping with GATK's best practices pipeline and previous studies. The complete list of genomes analysed in this study, including their accession IDs, is summarised in Supplementary Data S1. Clade-specific mutations were assigned to annotated genes in the TRUE927/4 reference genome using snpEFF. Protein domains and putative phosphorylation sites were identified in target genes using InterProScan accessed through TriTrypDB ( <a href="http://www.tritrypdb.org">www.TritrypDB.org</a> ). snpSIFT was then used to identify mutations which were specific to a monomorphic clade using the case-control function . For detailed variant analysis, genome feature summaries and target prediction, full information is provided in the Methods. |

For manuscripts utilizing custom algorithms or software that are central to the research but not yet described in published literature, software must be made available to editors and reviewers. We strongly encourage code deposition in a community repository (e.g. GitHub). See the Nature Portfolio [guidelines for submitting code & software](#) for further information.

## Data

Policy information about [availability of data](#)

All manuscripts must include a [data availability statement](#). This statement should provide the following information, where applicable:

- Accession codes, unique identifiers, or web links for publicly available datasets
- A description of any restrictions on data availability
- For clinical datasets or third party data, please ensure that the statement adheres to our [policy](#)

All data and code are available in the main text, the supplementary materials, GitHub (<https://github.com/goldrieve/Mechanisms-of-life-cycle-simplification>) or NCBI under the BioProject PRJNA1114649; reviewer access link : <https://eur02.safelinks.protection.outlook.com/?url=https%3A%2F%2Fdataview.ncbi.nlm.nih.gov%2Fobject%2FPRJNA1114649%3Fviewer%3Dvth6tbkquoagp9i2eloq8u1qdj&data=05%7C02%7C%7Cb9733b49fe834be075bd08dca5aafab5%7C2e9f06b016694589878910a06934dc61%7C0%7C0%7C638567400972824670%7CUnknown%7CTWFPbGZsb3d8eyJWljoic4wLjAwMDAilCJQljoiv2luMzliLjBTil6lk1haWwiLCJXVCi6Mn0%3D%7C0%7C%7C%7C&sdata=wemaXX2i%2FqgDMiBbMKBSarI%2FRf86o6gmAV2hi%2FbS9pM%3D&reserved=0>

## Research involving human participants, their data, or biological material

Policy information about studies with [human participants or human data](#). See also policy information about [sex, gender \(identity/presentation\), and sexual orientation](#) and [race, ethnicity and racism](#).

Reporting on sex and gender

Reporting on race, ethnicity, or other socially relevant groupings

Population characteristics

Recruitment

Ethics oversight

Note that full information on the approval of the study protocol must also be provided in the manuscript.

## Field-specific reporting

Please select the one below that is the best fit for your research. If you are not sure, read the appropriate sections before making your selection.

☒ Life sciences ☐ Behavioural & social sciences ☐ Ecological, evolutionary & environmental sciences

For a reference copy of the document with all sections, see [nature.com/documents/nr-reporting-summary-flat.pdf](https://nature.com/documents/nr-reporting-summary-flat.pdf)

## Life sciences study design

All studies must disclose on these points even when the disclosure is negative.

Sample size

Data exclusions

Replication

Randomization

Blinding

# Reporting for specific materials, systems and methods

We require information from authors about some types of materials, experimental systems and methods used in many studies. Here, indicate whether each material, system or method listed is relevant to your study. If you are not sure if a list item applies to your research, read the appropriate section before selecting a response.

## Materials & experimental systems

|                                     |                                                                 |
|-------------------------------------|-----------------------------------------------------------------|
| n/a                                 | Involved in the study                                           |
| <input type="checkbox"/>            | <input checked="" type="checkbox"/> Antibodies                  |
| <input type="checkbox"/>            | <input checked="" type="checkbox"/> Eukaryotic cell lines       |
| <input checked="" type="checkbox"/> | <input type="checkbox"/> Palaeontology and archaeology          |
| <input type="checkbox"/>            | <input checked="" type="checkbox"/> Animals and other organisms |
| <input checked="" type="checkbox"/> | <input type="checkbox"/> Clinical data                          |
| <input checked="" type="checkbox"/> | <input type="checkbox"/> Dual use research of concern           |
| <input checked="" type="checkbox"/> | <input type="checkbox"/> Plants                                 |

## Methods

|                                     |                                                 |
|-------------------------------------|-------------------------------------------------|
| n/a                                 | Involved in the study                           |
| <input checked="" type="checkbox"/> | <input type="checkbox"/> ChIP-seq               |
| <input checked="" type="checkbox"/> | <input type="checkbox"/> Flow cytometry         |
| <input checked="" type="checkbox"/> | <input type="checkbox"/> MRI-based neuroimaging |

## Antibodies

|                 |                                                                                                                                                                                                                                                                                                                                                                    |
|-----------------|--------------------------------------------------------------------------------------------------------------------------------------------------------------------------------------------------------------------------------------------------------------------------------------------------------------------------------------------------------------------|
| Antibodies used | Anti-PAD1, Dean et al., 2009.<br>Anti-rabbit (goat anti-rabbit IgG (H+L) Dylight 800; Thermofisher Cat#SA5-10036<br>Anti-Ty1 epitope tag specific BB2 antibody. Bastin et al., 1996; hybridoma cell line a gift of Keith Gull, Oxford University/available through Thermofisher. Cat#MA5-23513; RRID:AB_2610644<br>Anti-Mouse AlexaFluor 568. abcam. Cat# ab175701 |
| Validation      | Anti-PAD1, Dean et al., 2009.<br>Anti-rabbit (goat anti-rabbit IgG (H+L) Dylight 800; Thermofisher Cat#SA5-10036<br>Anti-Ty1 epitope tag specific BB2 antibody. Bastin et al., 1996; hybridoma cell line a gift of Keith Gull, Oxford University/available through Thermofisher. Cat#MA5-23513; RRID:AB_2610644<br>Anti-Mouse AlexaFluor 568. abcam. Cat# ab175701 |

## Eukaryotic cell lines

Policy information about [cell lines and Sex and Gender in Research](#)

|                                                                      |                                                                                                                                                                                   |
|----------------------------------------------------------------------|-----------------------------------------------------------------------------------------------------------------------------------------------------------------------------------|
| Cell line source(s)                                                  | Trypanosoma brucei EATRO 1125 AnTat1.1 J1339; Rojas et al 2018; Genomic analyses were performed on genomic material from cell lines and isolates detailed in Supplementary Data 1 |
| Authentication                                                       | Molecular validation (inducible expression of integrated target genes or successful gene knockout)                                                                                |
| Mycoplasma contamination                                             | Not tested                                                                                                                                                                        |
| Commonly misidentified lines<br>(See <a href="#">ICLAC</a> register) | N/A                                                                                                                                                                               |

## Animals and other research organisms

Policy information about [studies involving animals](#); [ARRIVE guidelines](#) recommended for reporting animal research, and [Sex and Gender in Research](#)

|                         |                                                                                                                        |
|-------------------------|------------------------------------------------------------------------------------------------------------------------|
| Laboratory animals      | Female age matched MF1 mice were used                                                                                  |
| Wild animals            | N/A                                                                                                                    |
| Reporting on sex        | Female mice were used throughout                                                                                       |
| Field-collected samples | N/A                                                                                                                    |
| Ethics oversight        | All work was carried out under a UK home office licence (P262AE604) that had been approved after local ethical review. |

Note that full information on the approval of the study protocol must also be provided in the manuscript.

## Plants

---

Seed stocks

N/A

Novel plant genotypes

N/A

Authentication

N/A
